# Supplementary material for: Heterogeneous assembly of Pt-clusters on hierarchically structured CoOx@SnPd2@SnO2 quaternary nanocatalysts manifesting oxygen reduction reaction performance
Source: Royal Society of Chemistry journal article supplement (doi:10.1039/d0nj01154a), 2020-01-01
Supplement: d0nj01154a1.pdf [file d0nj01154a1.pdf]

**Heterogeneous Assembly of Pt-Clusters on Hierarchical Structured  $\text{CoO}_x@\text{SnPd}_2@\text{SnO}_2$  Quaternary  
Nanocatalyst Manifesting Oxygen Reduction Reaction Performance**

Dinesh Bhalothia,<sup>a</sup> Po-Chun Chen,<sup>b†</sup> Che Yan,<sup>a</sup> Wei Yeh,<sup>a</sup> Dai-Ling Tsai,<sup>b</sup> Tin-Shan Chan,<sup>c</sup>

Kuan-Wen Wang,<sup>d</sup> and Tsan-Yao Chen<sup>a,e,f,g\*</sup>

Affiliations:

- <sup>a</sup> Department of Engineering and System Science, National Tsing Hua University, Hsinchu 30013, Taiwan
- <sup>b</sup> Department of Materials and Mineral Resources Engineering, National Taipei University of Technology, Taipei 10608, Taiwan
- <sup>c</sup> National Synchrotron Radiation Research Center (NSRRC), Hsinchu 30076, Taiwan
- <sup>d</sup> Institute of Materials Science and Engineering, National Central University, Taoyuan City 32001, Taiwan
- <sup>e</sup> Institute of Nuclear Engineering and Science, National Tsing Hua University, Hsinchu 30013, Taiwan
- <sup>f</sup> Hierarchical Green-Energy Materials (Hi-GEM) Research Centre, National Cheng Kung University, Tainan 70101, Taiwan
- <sup>g</sup> Higher Education Sprout Project, Competitive Research Team, National Tsing Hua University, Hsinchu 30013, Taiwan

Corresponding Author:

Tsan-Yao Chen

Email: [chencaeser@gmail.com](mailto:chencaeser@gmail.com)

Tel: +886-3-5715131 # 34271

FAX: +885-3-5720724

1. HRTEM analysis of CSP NC (i.e. without Pt decoration).

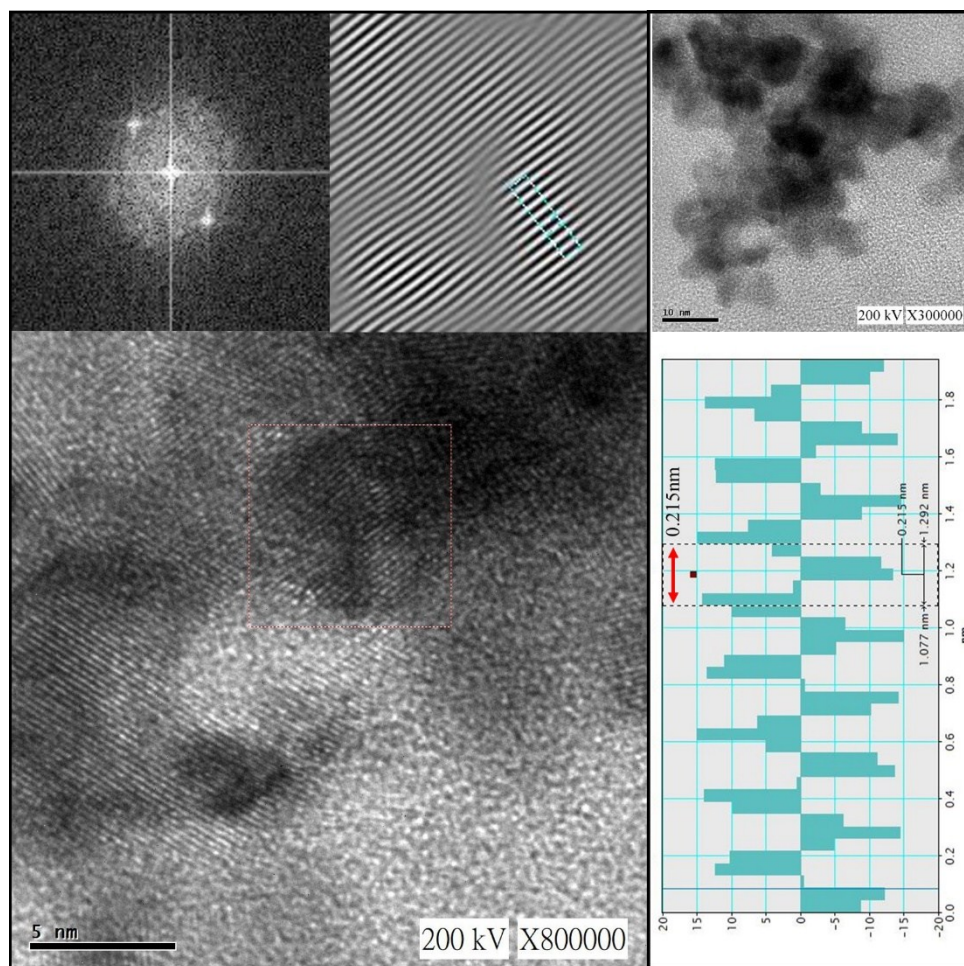

**Figure S1.** HRTEM images of CSP nanocatalyst.

## 2. XRD patterns of control samples

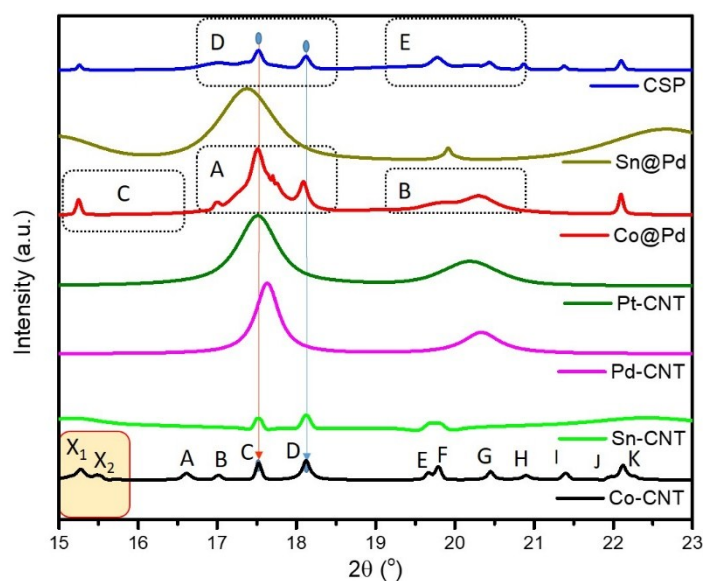

**Figure S2.** XRD patterns of control samples. The characteristics diffraction peaks A, B, C, D, E, F, G, H, I, J and K for Co-CNT are corresponding to tetragonal (211), hexagonal (211), (330), (301), (510), (20-2 4), (321), tetragonal (510), hexagonal (510), tetragonal (411) and hexagonal (411) planes, respectively. Meanwhile two peaks  $X_1$  and  $X_2$  (denoted in yellow region) are characteristics reflections from tetragonally packed  $\text{CoO}_2$  planes

## 3. Pd K-edge X-ray absorption spectra of control samples (a) XANES and (b) Fourier transformed EXAFS regions.

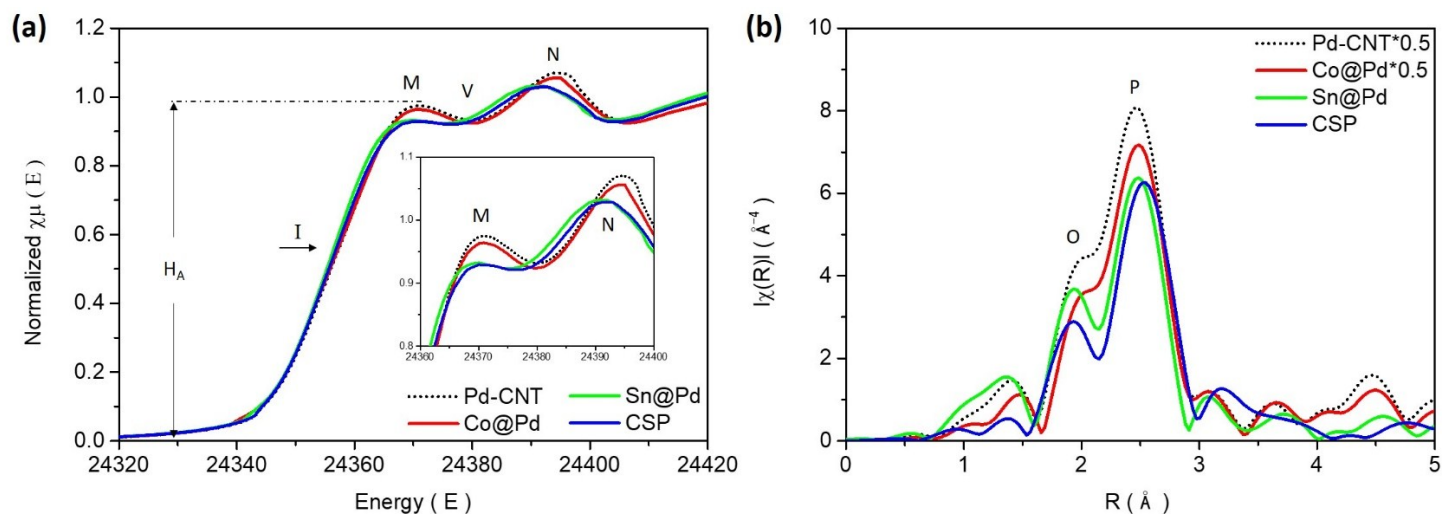

**Figure S3.** Pd K-edge X-ray absorption spectra of control samples (a) XANES and (b) Fourier transformed EXAFS regions.

**4. X-ray absorption spectroscopy analysis at Co k-edge and Sn k-edge of experimental CSPP NCs series and control samples.**

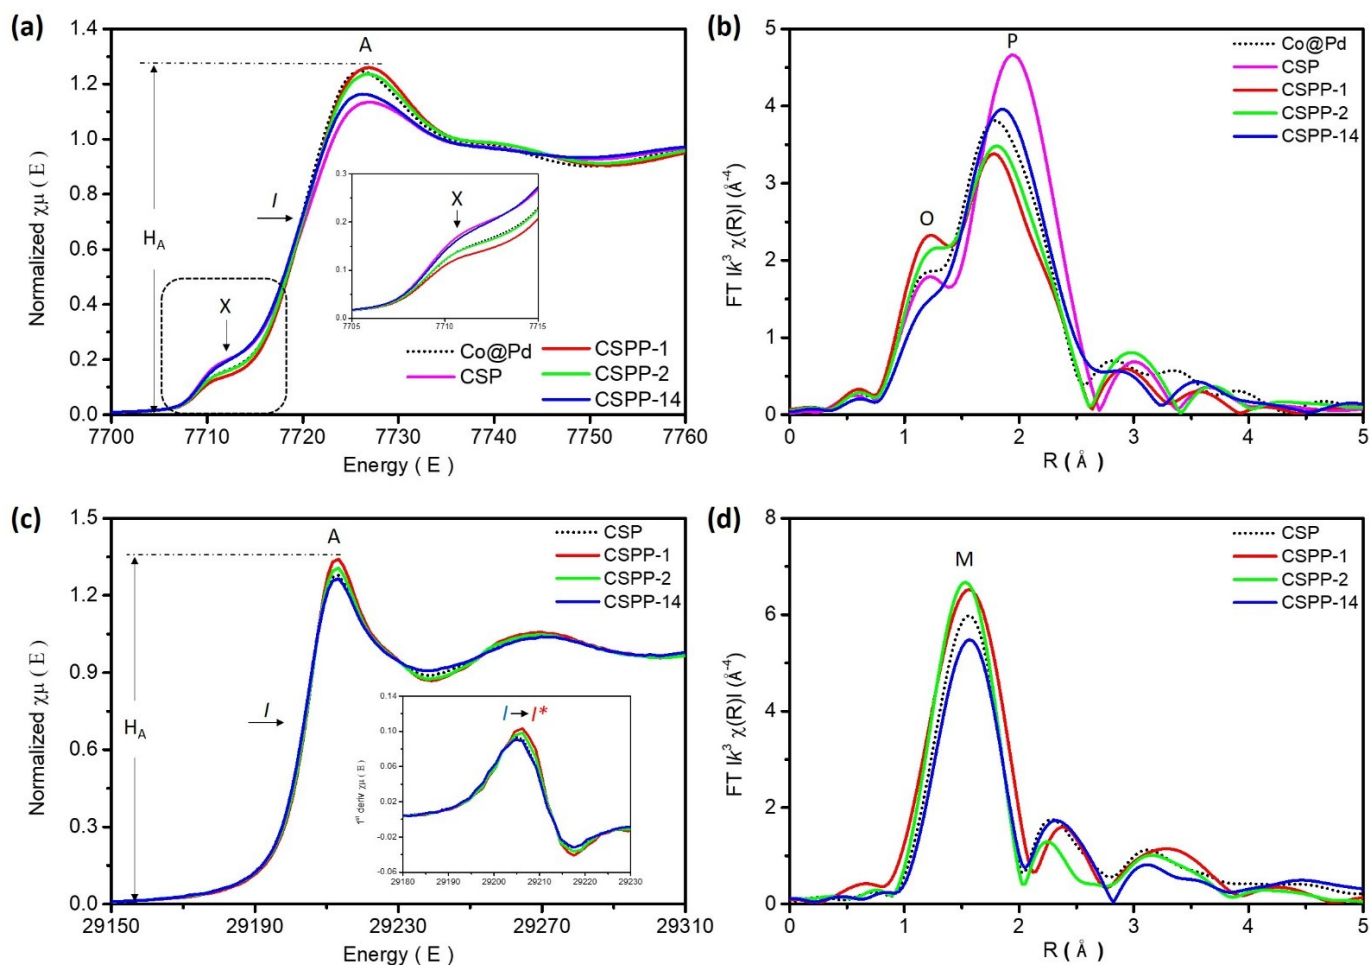

**Figure S4.** X-ray absorption spectroscopy of CSPP NCs and control samples. (a) XANES and (b) FT-EXAFS spectra of CSPP NCs at Co K-edge, compared with control sample. (c) XANES and (d) FT-EXAFS spectra of CSPP NCs at Sn K-edge.

**5. Sn K-edge X-ray absorption spectra of control samples (a) XANES and (b) Fourier transformed EXAFS regions.**

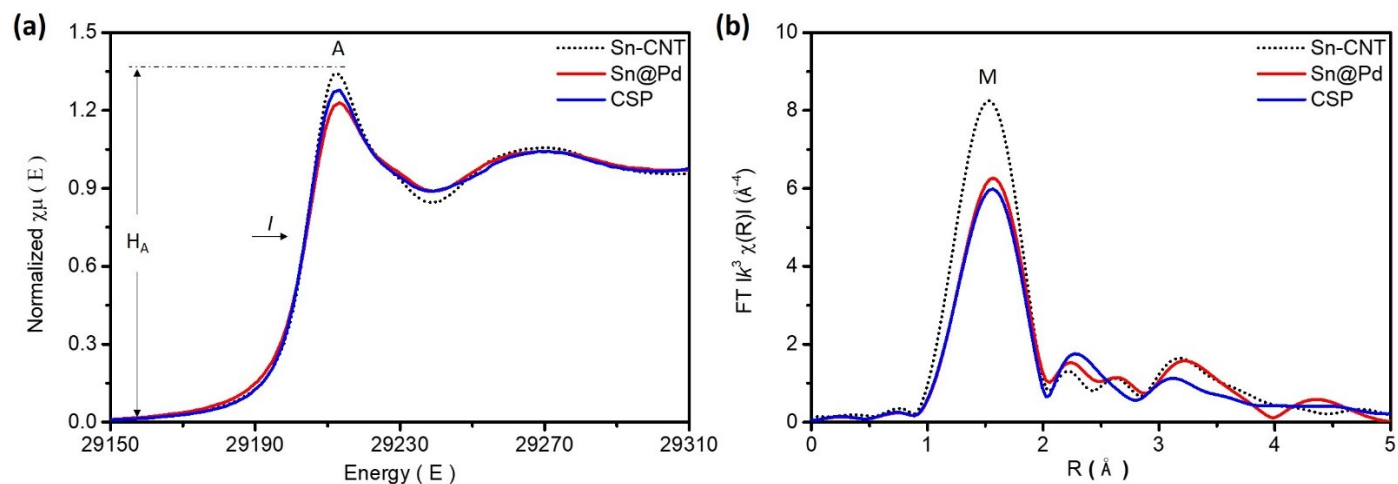

**Figure S5.** Sn K-edge X-ray absorption spectra of control samples (a) XANES and (b) Fourier transformed EXAFS regions.

**6. XPS determined composition ratios of experimental CSPP nanocatalysts**

**Table S1.** Comparative XPS determined composition ratios of experimental CSPP nanocatalysts.

| Samples | Surface composition (%) |       |       |      |
|---------|-------------------------|-------|-------|------|
|         | Co                      | Sn    | Pd    | Pt   |
| CSPP-1  | 23.31                   | 57.87 | 18.23 | 0.59 |
| CSPP-2  | 25.73                   | 55.57 | 17.81 | 1.48 |
| CSPP-14 | 32.32                   | 51.55 | 10.94 | 5.2  |

7. Comparative Nyquist plots of CSPP NCs under different applied potentials.

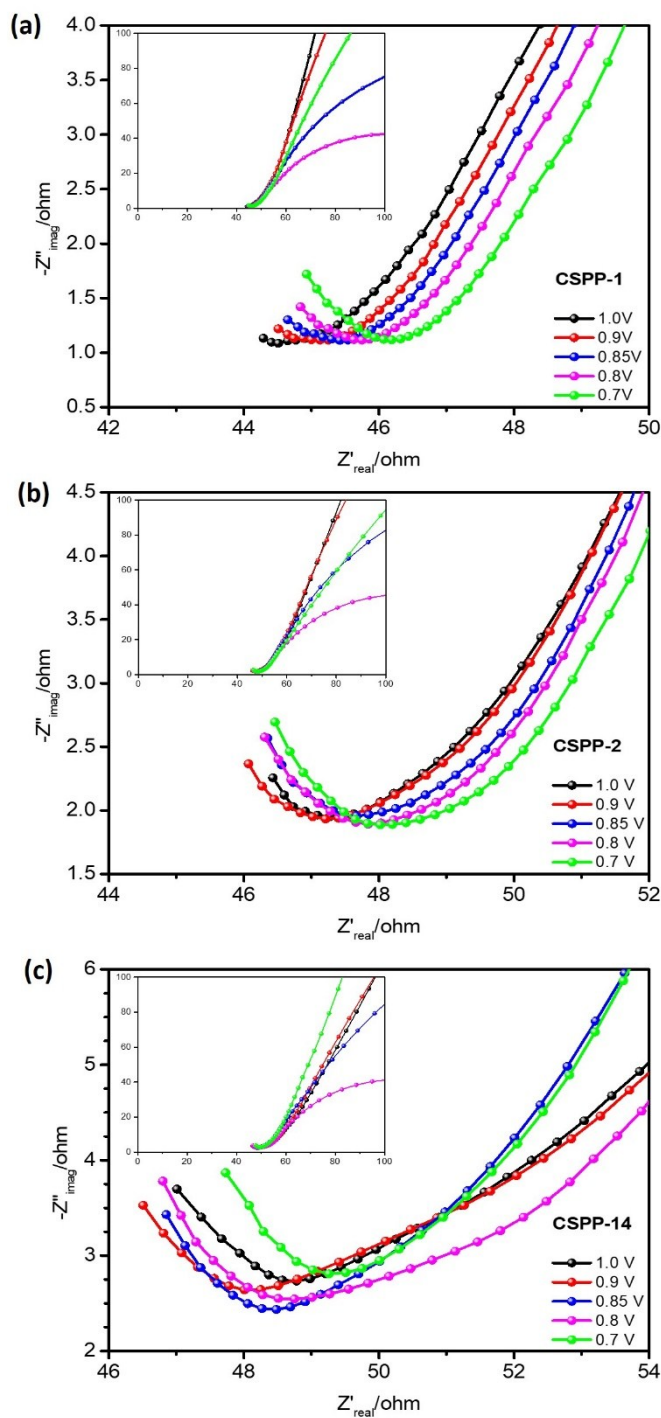

**Figure S6.** (a) Comparative Nyquist plots of (a) CSPP-1, (b) CSPP-2 and (c) CSPP-14 NCs under different applied potentials.

**Table S2.** Electrochemical performances of CSPP NCs compared with CSP and commercial catalysts (JM-Pt/C)

| Sample          | N<br>(0.5V) | $V_{oc}$<br>V vs RHE | $E_{1/2}$<br>V vs RHE | SA<br>( $\text{mAc m}^{-2}$ ) | $J_k$ 0.85V<br>$\text{mAc m}^{-2}$ | M.A. 0.85V<br>( $\text{mAmg}_{\text{Pt}}^{-1}$ ) | M.A. 0.85V<br>( $\text{mAmg}_{\text{Pd+Pt}}^{-1}$ ) |
|-----------------|-------------|----------------------|-----------------------|-------------------------------|------------------------------------|--------------------------------------------------|-----------------------------------------------------|
| J.M.-Pt/C       | 4.0         | 0.910                | 0.844                 | 0.261                         | 4.37                               | 67.0                                             | 67.0                                                |
| Pd-<br>standard | 4.0         | 0.895                | 0.831                 | N/A                           | 2.33                               | N/A                                              | 41.6                                                |
| CSP             | 3.2         | 0.896                | 0.834                 | NA                            | 1.95                               | NA                                               | 36.3                                                |
| CSPP-1          | 4.4         | 0.926                | 0.867                 | 0.534                         | 5.23                               | 2146.2                                           | 94.0                                                |
| CSPP-2          | 3.9         | 0.925                | 0.865                 | 0.603                         | 6.15                               | 1555.7                                           | 67.7                                                |
| CSPP-14         | 3.9         | 0.917                | 0.860                 | 0.711                         | 4.91                               | 223.6                                            | 47.9                                                |

## 8. Comparative LSV curves of Pd-standard and CSPP nanocatalysts.

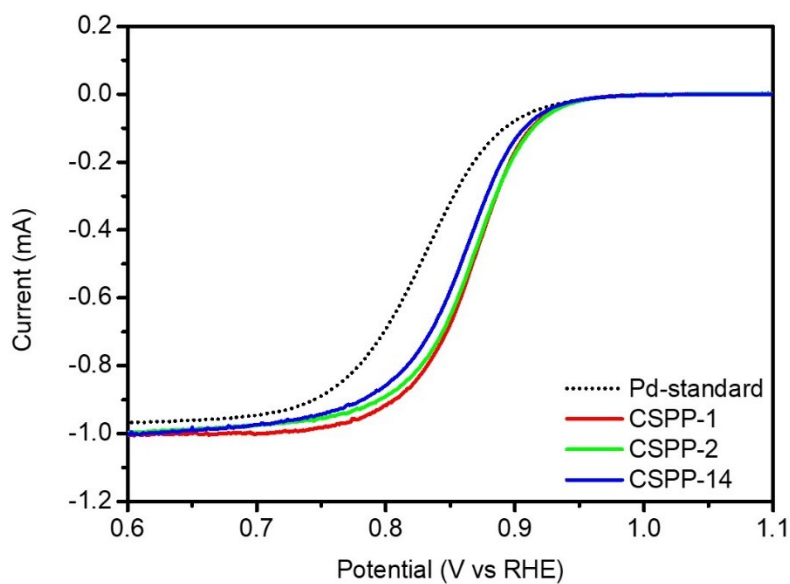

**Figure S7.** Comparative LSV curves of Pd-standard and CSPP nanocatalysts.



## 9. Fitted EIS curves of CSPP NCs.

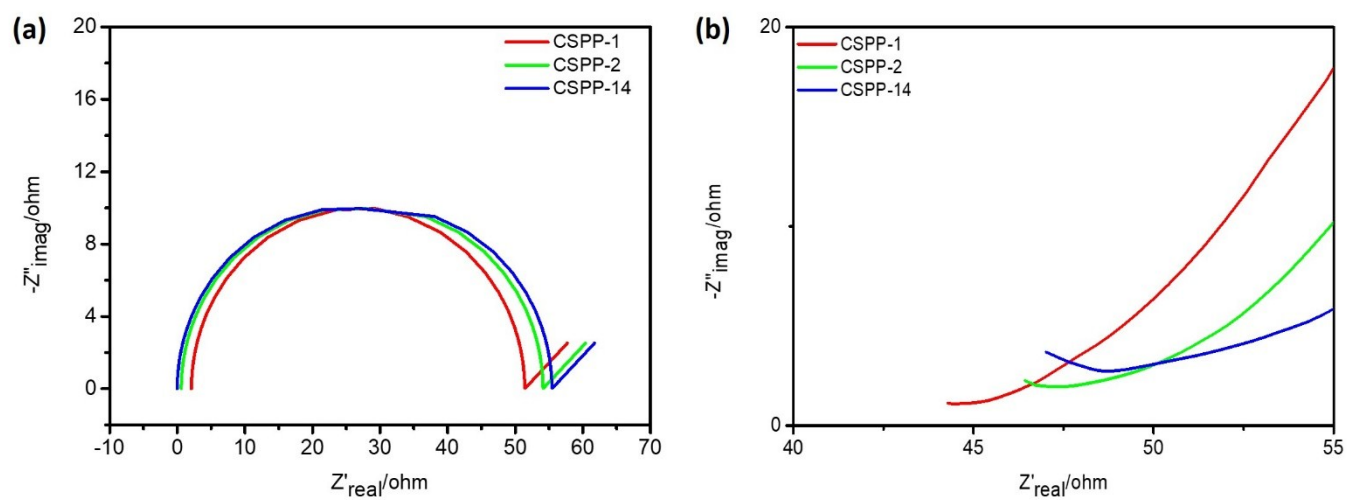

**Figure S8.** (a) Fitting and (b) as-obtained EIS curves of CSPP NCs.
